# Supplementary material
Source: PubMed Central journal article supplement (PMC4679353)
Supplement: thnov06p0040s1.pdf [file thnov06p0040s1.pdf]

## Supporting information

### Hyaluronic acid modified hollow Prussian blue nanoparticles loading 10-hydroxycamptothecin for targeting thermochemotherapy of cancer

*Lijia Jing<sup>1</sup>, Shangmin Shao<sup>3</sup>, Yang Wang<sup>3</sup>, Yongbo Yang<sup>1</sup>, Xiuli Yue<sup>1\*</sup>, Zhifei Dai<sup>2\*</sup>*

<sup>1</sup> State Key Laboratory of Urban Water Resources and Environment, School of Life Science and Technology, Harbin Institute of Technology, Harbin 150080, China

<sup>2</sup> Department of Biomedical Engineering, College of Engineering, Peking University, Beijing 100871, China.

<sup>3</sup> Alkali Soil Natural Environmental Science Center, Northeast Forestry University/Key Laboratory of Saline-alkali Vegetation Ecology Restoration in Oil Field, Ministry Education, Harbin, 150040, China

---

\* Corresponding author: Xiuli Yue

Email: [xiulidx@163.com](mailto:xiulidx@163.com)

\* Corresponding author: Zhifei Dai

Email: [zhifei.dai@pku.edu.cn](mailto:zhifei.dai@pku.edu.cn)

Homepage: <http://bme.pku.edu.cn/~daizhifei>

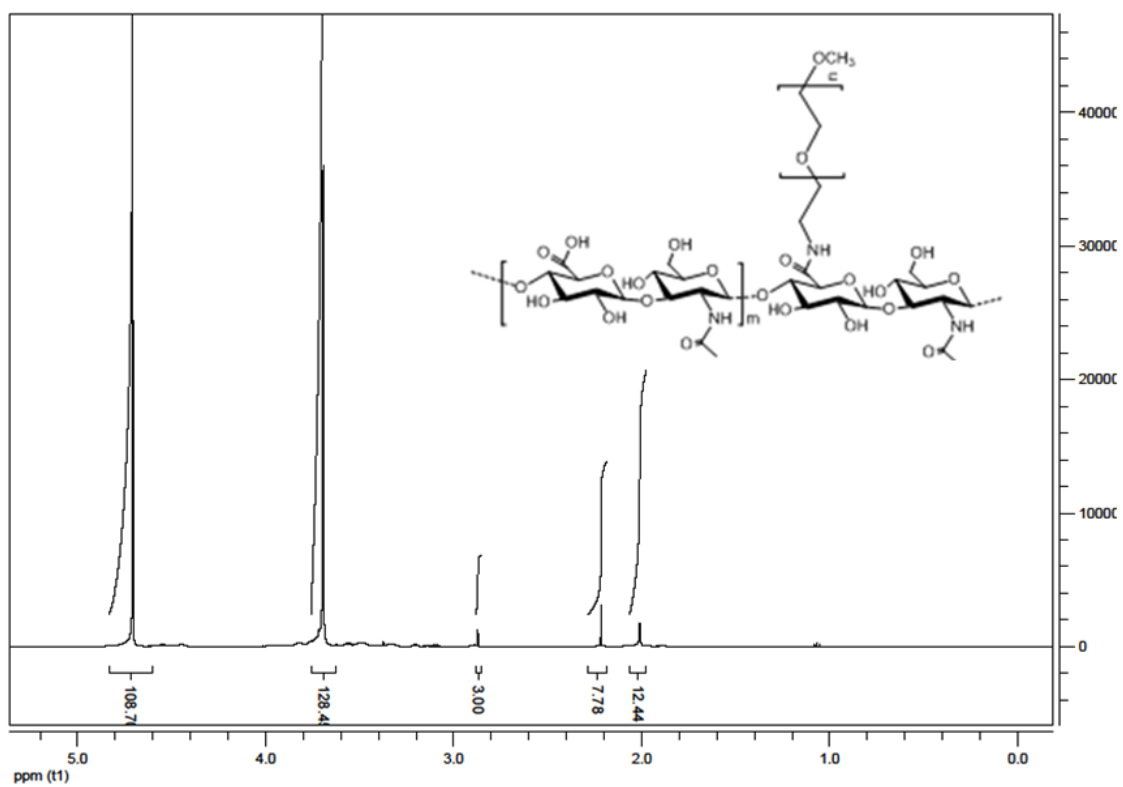

**Figure S1.**  $^1\text{H}$  NMR spectra of HA-g-PEG in  $\text{D}_2\text{O}$ .

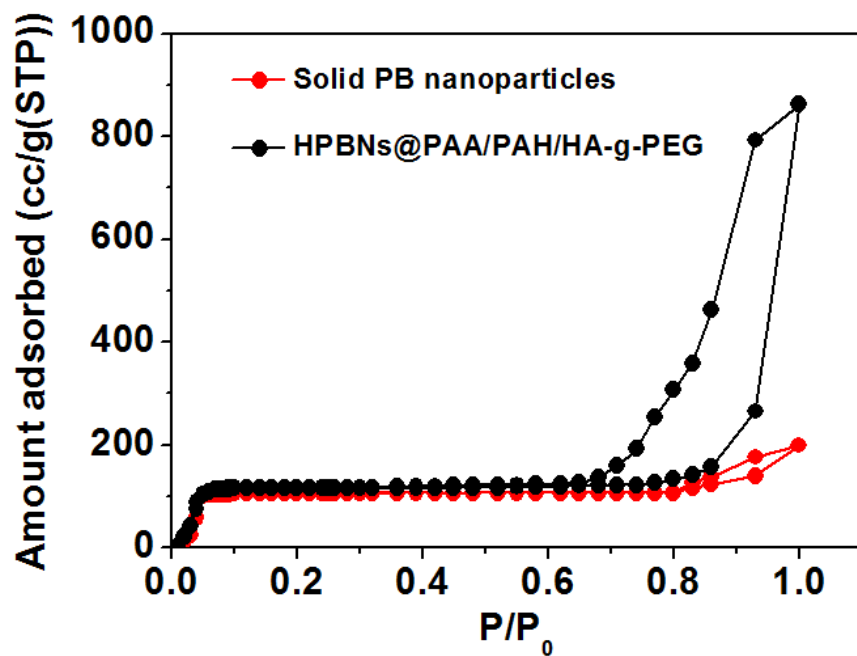

**Figure S2.** N<sub>2</sub> adsorption-desorption isotherm of solid PB nanoparticles and HPBNs@PAA/PAH/HA-g-PEG.

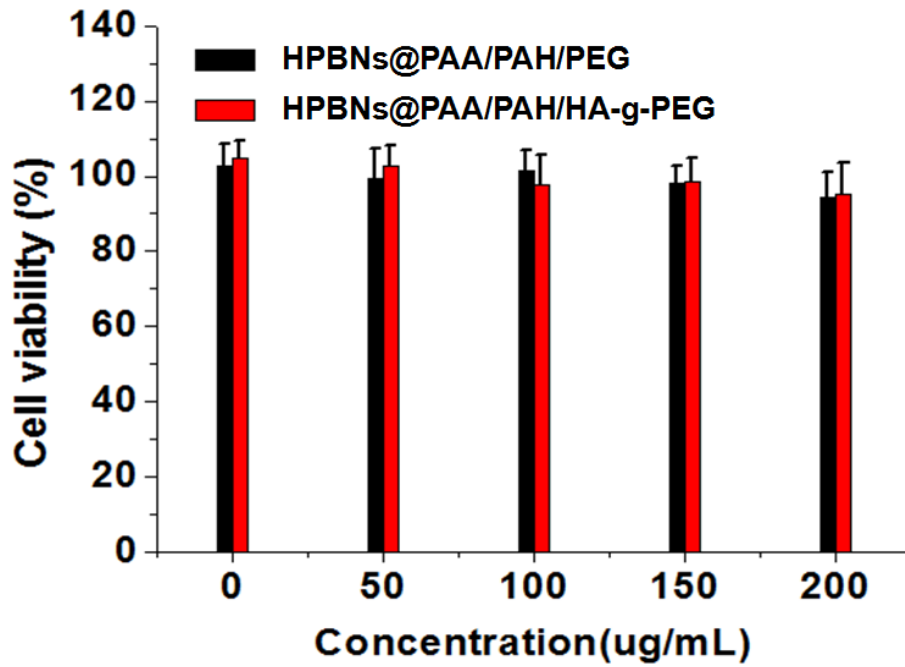

**Figure S3.** Cell viability of HeLa cells determined by MTT method after incubation with HPBNs@PAA/PAH/PEG and HPBNs@PAA/PAH/HA-g-PEG at different concentrations for 48h.

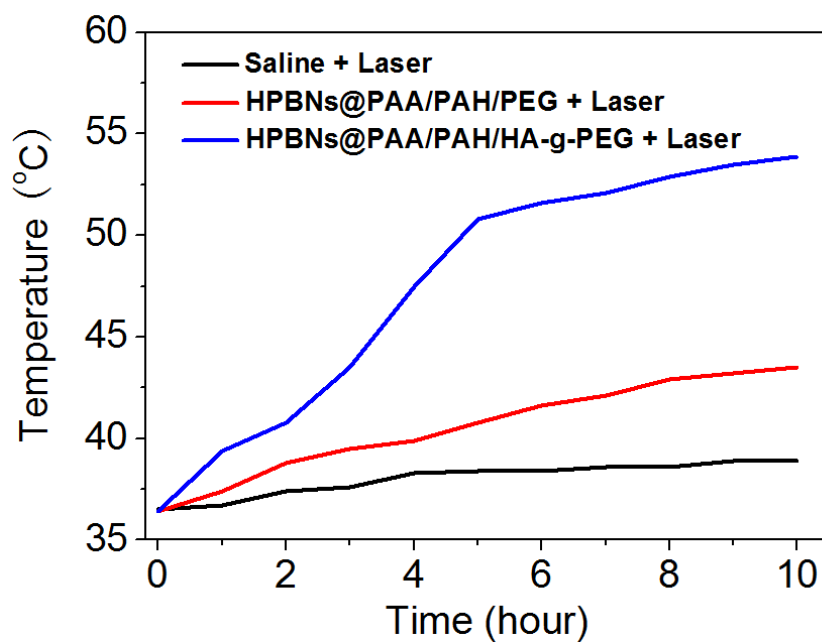

**Figure S4.** Temperature change curves determined by thermographic probe after treatments of the nude mice tumor with saline, HPBNs@PAA/PAH/PEG and HPBNs@PAA/PAH/HA-g-PEG upon exposure to the 808 nm laser at a power density of  $0.8\text{W}/\text{cm}^2$ .
